# Supplementary material for: A Central Small RNA Regulatory Circuit Controlling Bacterial Denitrification and N2O Emissions
Source: PubMed Central journal article supplement (PMC6686037; doi:10.1128/mbio.01165-19), 2019-08-06
Supplement: mBio.01165-19-st001.pdf [file mBio.01165-19-st001.pdf]

|          |           |               |                                                                      |
|----------|-----------|---------------|----------------------------------------------------------------------|
| ABL68278 | Pden_0161 |               | efflux transporter, RND family, MFP subunit                          |
| ABL68748 | Pden_0636 |               | Class I peptide chain release factor                                 |
| ABL68767 | Pden_0655 |               | nitrite/sulfite reductase, hemoprotein beta-component, ferredoxin d  |
| ABL68768 | Pden_0656 |               | phosphoadenylylsulfate reductase (thioredoxin)                       |
| ABL68769 | Pden_0657 |               | conserved hypothetical protein                                       |
| ABL68770 | Pden_0658 |               | Ferredoxin--NADP(+) reductase                                        |
| ABL68780 | Pden_0668 |               | transcriptional regulator, TetR family                               |
| ABL68801 | Pden_0689 |               | tRNA(Ile)-lysidine synthetase                                        |
| ABL68903 | Pden_0791 |               | HAD-superfamily hydrolase, subfamily IA, variant 3                   |
| ABL68993 | Pden_0882 |               | 6-phosphofructokinase                                                |
| ABL69027 | Pden_0916 |               | transcriptional regulator, TraR/DksA family                          |
| ABL69272 | Pden_1167 |               | molybdenum ABC transporter, periplasmic molybdate-binding protei     |
| ABL69342 | Pden_1237 |               | conserved hypothetical protein                                       |
| ABL69350 | Pden_1245 |               | 2-keto-3-deoxy-phosphogluconate aldolase                             |
| ABL69484 | Pden_1383 |               | hypothetical protein                                                 |
| ABL69786 | Pden_1689 |               | globin                                                               |
| ABL69894 | Pden_1797 |               | sulfate ABC transporter, ATPase subunit                              |
| ABL69895 | Pden_1798 |               | sulfate ABC transporter, periplasmic sulfate-binding protein         |
| ABL69896 | Pden_1799 |               | sulfate ABC transporter, inner membrane subunit CysT                 |
| ABL69897 | Pden_1800 |               | sulfate ABC transporter, inner membrane subunit CysW                 |
| ABL69924 | Pden_1827 |               | heat shock protein Hsp15                                             |
| ABL69965 | Pden_1868 |               | Beta-N-acetylhexosaminidase                                          |
| ABL69977 | Pden_1882 |               | hypothetical protein                                                 |
| ABL69997 | Pden_1902 |               | protein of unknown function DUF6, transmembrane                      |
| ABL70074 | Pden_1982 |               | conserved hypothetical protein                                       |
| ABL70088 | Pden_1996 |               | conserved hypothetical protein                                       |
| ABL70227 | Pden_2135 |               | conserved hypothetical protein ZK84.1                                |
| ABL70287 | Pden_2195 |               | Hydroxypyruvate reductase                                            |
| ABL70415 | Pden_2324 |               | FAD-dependent pyridine nucleotide-disulfide oxidoreductase           |
| ABL70561 | Pden_2474 |               | ATPase, BadF/BadG/BcrA/BcrD type                                     |
| ABL70562 | Pden_2475 | predicted tra | transcriptional regulator, GntR family                               |
| ABL70563 | Pden_2476 |               | glutamine--fructose-6-phosphate transaminase                         |
| ABL70564 | Pden_2477 |               | N-acetylglucosamine 6-phosphate deacetylase                          |
| ABL70570 | Pden_2483 | norB          | nitric oxide reductase, NorB subunit apoprotein                      |
| ABL70571 | Pden_2484 | norC          | nitric oxide reductase, NorC subunit apoprotein                      |
| ABL70574 | Pden_2487 | nirS          | dissimilatory nitrite reductase (NO-forming), cytochrome cd1 type ap |
| ABL70582 | Pden_2495 |               | cytochrome d1, heme region                                           |
| ABL70776 | Pden_2689 |               | flavin reductase domain protein, FMN-binding protein                 |
| ABL70797 | Pden_2713 |               | DNA mismatch repair protein MutL                                     |
| ABL70825 | Pden_2741 |               | hypothetical protein                                                 |
| ABL70932 | Pden_2848 |               | Phosphotransferase system, phosphocarrier protein HPr                |
| ABL71485 | Pden_3414 |               | conserved hypothetical protein                                       |
| ABL72124 | Pden_4058 |               | protein of unknown function UPF0061                                  |
| ABL72189 | Pden_4125 |               | cation transporter                                                   |
| ABL72283 | Pden_4219 | nosZ          | nitrous oxide reductase apoprotein                                   |
| ABL72288 | Pden_4224 |               | protein of unknown function DUF542, ScdA domain protein              |

|          |           |                                                                    |
|----------|-----------|--------------------------------------------------------------------|
| ABL72303 | Pden_4239 | DNA-O6-methylguanine--protein-cysteine S-methyltransferase         |
| ABL72370 | Pden_4306 | ABC transporter related protein                                    |
| ABL72391 | Pden_4327 | phosphate ABC transporter ATP-binding protein, PhoT family         |
| ABL72433 | Pden_4369 | predicted tra transcriptional regulator, LysR family               |
| ABL72439 | Pden_4375 | ribonucleoside-diphosphate reductase class Ib glutaredoxin subunit |
| ABL72568 | Pden_4504 | conserved hypothetical protein                                     |
| ABL72997 | Pden_4937 | conserved hypothetical protein                                     |
| ABL73077 | Pden_5017 | conserved hypothetical protein                                     |

|                | log2FoldChange |                   | functional category            |
|----------------|----------------|-------------------|--------------------------------|
| lomain protein | 0.639863       | UP                | transport                      |
|                | 0.869439       | UP                | Genetic Information Processing |
|                | -1.72719       | DOWN              | Energy metabolism              |
|                | -1.90786       | DOWN              | Energy metabolism              |
|                | -1.45455       | DOWN              | hypothetical                   |
|                | -0.8771        | DOWN              | Energy metabolism              |
|                | 0.447716       | UP                | transcriptional regulator      |
|                | 0.987058       | UP                | Genetic Information Processing |
|                | 0.907832       | UP                | carbohydrate metabolism        |
|                | 0.962628       | UP                | carbohydrate metabolism        |
| n              | -0.59909       | DOWN              | transcriptional regulator      |
|                | 0.528788       | UP                | transport                      |
|                | 0.922089       | UP                | hypothetical                   |
|                | 1.073438       | UP                | carbohydrate metabolism        |
|                | 0.613956       | UP                | hypothetical                   |
|                | -2.18116       | DOWN              | Energy metabolism              |
|                | -1.66508       | DOWN              | transport                      |
|                | -2.05853       | DOWN              | transport                      |
|                | -1.64765       | DOWN              | transport                      |
|                | -1.63119       | DOWN              | transport                      |
| oprotein       | 1.198005       | UP                | Genetic Information Processing |
|                | 0.688085       | UP                | carbohydrate metabolism        |
|                | 1.058049       | UP                | hypothetical                   |
|                | 0.745342       | UP                | hypothetical                   |
|                | 1.197134       | UP                | hypothetical                   |
|                | 0.787668       | UP                | hypothetical                   |
|                | 0.984826       | UP                | hypothetical                   |
|                | 0.994124       | UP                | carbohydrate metabolism        |
|                | 0.683054       | UP                | Lipid metabolism               |
|                | 1.242741       | UP                | carbohydrate metabolism        |
| oprotein       | 0.808676       | UP                | transcriptional regulator      |
|                | 0.794095       | UP                | carbohydrate metabolism        |
|                | 0.839942       | UP                | carbohydrate metabolism        |
|                | -1.06656       | DOWN              | Energy metabolism              |
|                | -1.07917       | DOWN              | Energy metabolism              |
|                | -1.03823       | DOWN              | Energy metabolism              |
|                | -0.80336       | DOWN              | Energy metabolism              |
|                | 0.962216       | UP                | hypothetical                   |
|                | 0.722095       | UP                | Genetic Information Processing |
|                | -0.75617       | DOWN              | hypothetical                   |
| 0.8047         | UP             | transport         |                                |
| 0.69627        | UP             | hypothetical      |                                |
| 0.784683       | UP             | hypothetical      |                                |
| 0.563168       | UP             | transport         |                                |
| -1.01544       | DOWN           | Energy metabolism |                                |
| -0.94098       | DOWN           | hypothetical      |                                |

|          |      |                           |
|----------|------|---------------------------|
| 0.982809 | UP   | transport                 |
| -0.6948  | DOWN | transport                 |
| -0.41649 | DOWN | transport                 |
| 0.846939 | UP   | transcriptional regulator |
| 0.57419  | UP   | hypothetical              |
| 0.853746 | UP   | hypothetical              |
| 0.615358 | UP   | hypothetical              |
| -1.23238 | DOWN | hypothetical              |
